# Supplementary material for: Financial interventions for family caregivers of individuals with chronic illness: a scoping review protocol
Source: HighWire-hosted journal article supplement (doi:10.1136/bmjopen-2022-061667), 2022-08-01
Supplement: bmjopen-2022-061667supp001_data_supplement.pdf [file bmjopen-2022-061667supp001_data_supplement.pdf]

## Appendix 1: Search Strategies by Database

### MEDLINE Search Strategy

((Caregiver AND (family OR child OR spousal OR partner OR unpaid OR informal OR friend OR neighbor)) OR (Carer AND (family OR child OR spousal OR partner OR unpaid OR informal OR friend OR neighbor))) AND (Chronic illness OR Chronic Disease OR Multiple Chronic Conditions) AND (Financial OR Economic OR Financial Support OR Financial Stress) AND ((Intervention AND Methods) OR (Intervention OR Psychosocial Intervention OR Internet-Based Intervention))

Filter 1997-present

### PubMed Search Strategy

((("caregiver s"[All Fields] OR "caregivers"[MeSH Terms] OR "caregivers"[All Fields] OR "caregiver"[All Fields] OR "caregiving"[All Fields]) AND 1997/01/01:2022/12/31[Date - Publication] AND ("familiarities"[All Fields] OR "familiarity"[All Fields] OR "familiarily"[All Fields] OR "familials"[All Fields] OR "familie"[All Fields] OR "family"[MeSH Terms] OR "family"[All Fields] OR "familial"[All Fields] OR "families"[All Fields] OR "family s"[All Fields] OR "familys"[All Fields] OR ("child"[MeSH Terms] OR "child"[All Fields] OR "children"[All Fields] OR "child s"[All Fields] OR "children s"[All Fields] OR "childrens"[All Fields] OR "childs"[All Fields]) OR "spousal"[All Fields] OR ("partner"[All Fields] OR "partner s"[All Fields] OR "partnered"[All Fields] OR "partnering"[All Fields] OR "partners"[All Fields]) OR "unpaid"[All Fields] OR ("inform"[All Fields] OR "informal"[All Fields] OR "informality"[All Fields] OR "informally"[All Fields] OR "informant"[All Fields] OR "informant s"[All Fields] OR "informants"[All Fields] OR "information"[All Fields] OR "information s"[All Fields] OR "informational"[All Fields] OR "informations"[All Fields] OR "informative"[All Fields] OR "informatively"[All Fields] OR "informativeness"[All Fields] OR "informativity"[All Fields] OR "informed"[All Fields] OR "informer"[All Fields] OR "informers"[All Fields] OR "informing"[All Fields] OR "informs"[All Fields]) OR ("friend s"[All Fields] OR "friending"[All Fields] OR "friends"[MeSH Terms] OR "friends"[All Fields] OR "friend"[All Fields]) OR ("neighbor"[All Fields] OR "neighbor s"[All Fields] OR "neighbored"[All Fields] OR "neighboring"[All Fields] OR "neighbors"[All Fields] OR "neighbour"[All Fields] OR "neighbour s"[All Fields] OR "neighbouring"[All Fields] OR "neighbours"[All Fields])) AND 1997/01/01:2023/12/31[Date - Publication])) OR ((("caregivers"[MeSH Terms] OR "caregivers"[All Fields] OR "carer"[All Fields] OR "carers"[All Fields] OR "carer s"[All Fields]) AND 1997/01/01:2022/12/31[Date - Publication] AND ("familiarities"[All Fields] OR "familiarity"[All Fields] OR "familiarily"[All Fields] OR "familials"[All Fields] OR "familie"[All Fields] OR "family"[MeSH Terms] OR "family"[All Fields] OR "familial"[All Fields] OR "families"[All Fields] OR "family s"[All Fields] OR "familys"[All Fields] OR ("child"[MeSH Terms] OR "child"[All Fields] OR "children"[All Fields] OR "child s"[All Fields] OR "children s"[All Fields] OR "childrens"[All Fields] OR "childs"[All Fields]) OR "spousal"[All Fields] OR ("partner"[All Fields] OR

"partner s"[All Fields] OR "partnered"[All Fields] OR "partnering"[All Fields] OR "partners"[All Fields] OR "unpaid"[All Fields] OR ("inform"[All Fields] OR "informal"[All Fields] OR "informality"[All Fields] OR "informally"[All Fields] OR "informant"[All Fields] OR "informant s"[All Fields] OR "informants"[All Fields] OR "information"[All Fields] OR "information s"[All Fields] OR "informational"[All Fields] OR "informations"[All Fields] OR "informative"[All Fields] OR "informatively"[All Fields] OR "informativeness"[All Fields] OR "informativity"[All Fields] OR "informed"[All Fields] OR "informer"[All Fields] OR "informers"[All Fields] OR "informing"[All Fields] OR "informs"[All Fields]) OR ("friend s"[All Fields] OR "friending"[All Fields] OR "friends"[MeSH Terms] OR "friends"[All Fields] OR "friend"[All Fields]) OR ("neighbor"[All Fields] OR "neighbor s"[All Fields] OR "neighbored"[All Fields] OR "neighboring"[All Fields] OR "neighbors"[All Fields] OR "neighbour"[All Fields] OR "neighbour s"[All Fields] OR "neighbouring"[All Fields] OR "neighbours"[All Fields])) AND 1997/01/01:2023/12/31[Date - Publication])) AND (("chronic disease"[MeSH Terms] OR ("chronic"[All Fields] AND "disease"[All Fields]) OR "chronic disease"[All Fields] OR ("chronic"[All Fields] AND "illness"[All Fields]) OR "chronic illness"[All Fields] OR ("chronic disease"[MeSH Terms] OR ("chronic"[All Fields] AND "disease"[All Fields]) OR "chronic disease"[All Fields]) OR ("multiple chronic conditions"[MeSH Terms] OR ("multiple"[All Fields] AND "chronic"[All Fields] AND "conditions"[All Fields]) OR "multiple chronic conditions"[All Fields])) AND 1997/01/01:2022/12/31[Date - Publication]) AND (("economics"[MeSH Terms] OR "economics"[All Fields] OR "financial"[All Fields] OR "financially"[All Fields] OR "financials"[All Fields] OR "financier"[All Fields] OR "financiers"[All Fields] OR ("economical"[All Fields] OR "economics"[MeSH Terms] OR "economics"[All Fields] OR "economic"[All Fields] OR "economically"[All Fields] OR "economics"[MeSH Subheading] OR "economization"[All Fields] OR "economize"[All Fields] OR "economized"[All Fields] OR "economizes"[All Fields] OR "economizing"[All Fields]) OR ("financial support"[MeSH Terms] OR ("financial"[All Fields] AND "support"[All Fields]) OR "financial support"[All Fields]) OR ("financial stress"[MeSH Terms] OR ("financial"[All Fields] AND "stress"[All Fields]) OR "financial stress"[All Fields])) AND 1997/01/01:2023/12/31[Date - Publication]) AND (((("intervention s"[All Fields] OR "interventions"[All Fields] OR "interventive"[All Fields] OR "methods"[MeSH Terms] OR "methods"[All Fields] OR "intervention"[All Fields] OR "interventional"[All Fields]) AND ("method s"[All Fields] OR "methods"[MeSH Terms] OR "methods"[All Fields] OR "method"[All Fields] OR "methods"[MeSH Subheading]) AND 1997/01/01:2022/12/31[Date - Publication]) OR (("intervention s"[All Fields] OR "interventions"[All Fields] OR "interventive"[All Fields] OR "methods"[MeSH Terms] OR "methods"[All Fields] OR "intervention"[All Fields] OR "interventional"[All Fields] OR ("psychosocial intervention"[MeSH Terms] OR ("psychosocial"[All Fields] AND "intervention"[All Fields]) OR "psychosocial intervention"[All Fields]) OR ("internet based intervention"[MeSH Terms] OR ("internet based"[All Fields] AND "intervention"[All Fields]) OR "internet based intervention"[All Fields] OR ("internet"[All Fields] AND "based"[All Fields] AND "intervention"[All Fields]) OR "internet based intervention"[All Fields])) AND 1997/01/01:2022/12/31[Date - Publication]))

## Translations

caregiver: "caregiver's"[All Fields] OR "caregivers"[MeSH Terms] OR "caregivers"[All Fields] OR "caregiver"[All Fields] OR "caregiving"[All Fields]

family: "familialities"[All Fields] OR "familiality"[All Fields] OR "familiably"[All Fields] OR "familials"[All Fields] OR "familie"[All Fields] OR "family"[MeSH Terms] OR "family"[All Fields] OR "familial"[All Fields] OR "families"[All Fields] OR "family's"[All Fields] OR "familys"[All Fields]

child: "child"[MeSH Terms] OR "child"[All Fields] OR "children"[All Fields] OR "child's"[All Fields] OR "children's"[All Fields] OR "childrens"[All Fields] OR "childs"[All Fields]

partner: "partner"[All Fields] OR "partner's"[All Fields] OR "partnered"[All Fields] OR "partnering"[All Fields] OR "partners"[All Fields]

informal: "inform"[All Fields] OR "informal"[All Fields] OR "informality"[All Fields] OR "informally"[All Fields] OR "informant"[All Fields] OR "informant's"[All Fields] OR "informants"[All Fields] OR "information"[All Fields] OR "information's"[All Fields] OR "informational"[All Fields] OR "informations"[All Fields] OR "informative"[All Fields] OR "informatively"[All Fields] OR "informativeness"[All Fields] OR "informativity"[All Fields] OR "informed"[All Fields] OR "informer"[All Fields] OR "informers"[All Fields] OR "informing"[All Fields] OR "informs"[All Fields]

friend: "friend's"[All Fields] OR "friending"[All Fields] OR "friends"[MeSH Terms] OR "friends"[All Fields] OR "friend"[All Fields]

neighbor: "neighbor"[All Fields] OR "neighbor's"[All Fields] OR "neighbored"[All Fields] OR "neighboring"[All Fields] OR "neighbors"[All Fields] OR "neighbour"[All Fields] OR "neighbour's"[All Fields] OR "neighbouring"[All Fields] OR "neighbours"[All Fields]

carer: "caregivers"[MeSH Terms] OR "caregivers"[All Fields] OR "carer"[All Fields] OR "carers"[All Fields] OR "carer's"[All Fields]

family: "familialities"[All Fields] OR "familiality"[All Fields] OR "familiably"[All Fields] OR "familials"[All Fields] OR "familie"[All Fields] OR "family"[MeSH Terms] OR "family"[All Fields] OR "familial"[All Fields] OR "families"[All Fields] OR "family's"[All Fields] OR "familys"[All Fields]

child: "child"[MeSH Terms] OR "child"[All Fields] OR "children"[All Fields] OR "child's"[All Fields] OR "children's"[All Fields] OR "childrens"[All Fields] OR "childs"[All Fields]

partner: "partner"[All Fields] OR "partner's"[All Fields] OR "partnered"[All Fields] OR "partnering"[All Fields] OR "partners"[All Fields]

informal: "inform"[All Fields] OR "informal"[All Fields] OR "informality"[All Fields] OR "informally"[All Fields] OR "informant"[All Fields] OR "informant's"[All Fields] OR

"informants"[All Fields] OR "information"[All Fields] OR "information's"[All Fields] OR "informational"[All Fields] OR "informations"[All Fields] OR "informative"[All Fields] OR "informatively"[All Fields] OR "informativeness"[All Fields] OR "informativity"[All Fields] OR "informed"[All Fields] OR "informer"[All Fields] OR "informers"[All Fields] OR "informing"[All Fields] OR "informs"[All Fields]

friend: "friend's"[All Fields] OR "friending"[All Fields] OR "friends"[MeSH Terms] OR "friends"[All Fields] OR "friend"[All Fields]

neighbor: "neighbor"[All Fields] OR "neighbor's"[All Fields] OR "neighbored"[All Fields] OR "neighboring"[All Fields] OR "neighbors"[All Fields] OR "neighbour"[All Fields] OR "neighbour's"[All Fields] OR "neighbouring"[All Fields] OR "neighbours"[All Fields]

chronic illness: "chronic disease"[MeSH Terms] OR ("chronic"[All Fields] AND "disease"[All Fields]) OR "chronic disease"[All Fields] OR ("chronic"[All Fields] AND "illness"[All Fields]) OR "chronic illness"[All Fields]

chronic disease: "chronic disease"[MeSH Terms] OR ("chronic"[All Fields] AND "disease"[All Fields]) OR "chronic disease"[All Fields]

multiple chronic conditions: "multiple chronic conditions"[MeSH Terms] OR ("multiple"[All Fields] AND "chronic"[All Fields] AND "conditions"[All Fields]) OR "multiple chronic conditions"[All Fields]

financial: "economics"[MeSH Terms] OR "economics"[All Fields] OR "financial"[All Fields] OR "financially"[All Fields] OR "financials"[All Fields] OR "financier"[All Fields] OR "financiers"[All Fields]

economic: "economical"[All Fields] OR "economics"[MeSH Terms] OR "economics"[All Fields] OR "economic"[All Fields] OR "economically"[All Fields] OR "economics"[Subheading] OR "economization"[All Fields] OR "economize"[All Fields] OR "economized"[All Fields] OR "economizes"[All Fields] OR "economizing"[All Fields]

financial support: "financial support"[MeSH Terms] OR ("financial"[All Fields] AND "support"[All Fields]) OR "financial support"[All Fields]

financial stress: "financial stress"[MeSH Terms] OR ("financial"[All Fields] AND "stress"[All Fields]) OR "financial stress"[All Fields]

intervention: "intervention's"[All Fields] OR "interventions"[All Fields] OR "interventive"[All Fields] OR "methods"[MeSH Terms] OR "methods"[All Fields] OR "intervention"[All Fields] OR "interventional"[All Fields]

methods: "method's"[All Fields] OR "methods"[MeSH Terms] OR "methods"[All Fields] OR "method"[All Fields] OR "methods"[Subheading]

intervention: "intervention's"[All Fields] OR "interventions"[All Fields] OR "interventive"[All Fields] OR "methods"[MeSH Terms] OR "methods"[All Fields] OR "intervention"[All Fields] OR "interventional"[All Fields]

psychosocial intervention: "psychosocial intervention"[MeSH Terms] OR ("psychosocial"[All Fields] AND "intervention"[All Fields]) OR "psychosocial intervention"[All Fields]

internet-based intervention: "internet-based intervention"[MeSH Terms] OR ("internet-based"[All Fields] AND "intervention"[All Fields]) OR "internet-based intervention"[All Fields] OR ("internet"[All Fields] AND "based"[All Fields] AND "intervention"[All Fields]) OR "internet based intervention"[All Fields]Filter 1997-present

### **CINAHL Complete Search Strategy**

((Caregiver AND (family OR child OR spousal OR partner OR unpaid OR informal OR friend OR neighbor)) OR (Carer AND (family OR child OR spousal OR partner OR unpaid OR informal OR friend OR neighbor))) AND (Chronic illness OR Chronic Disease OR Multiple Chronic Conditions) AND (Financial OR Economic OR Financial Support OR Financial Stress) AND ((Intervention AND Methods) OR (Intervention OR Psychosocial Intervention OR Internet-Based Intervention))

Filter 1997-present

### **Cochrane Library Search Strategy**

((Caregiver AND (family OR child OR spousal OR partner OR unpaid OR informal OR friend OR neighbor)) OR (Carer AND (family OR child OR spousal OR partner OR unpaid OR informal OR friend OR neighbor))) AND (Chronic illness OR Chronic Disease OR Multiple Chronic Conditions) AND (Financial OR Economic OR Financial Support OR Financial Stress) AND ((Intervention AND Methods) OR (Intervention OR Psychosocial Intervention OR Internet-Based Intervention))

Filter 1997-present

### **PsychInfo Search Strategy**

((Caregiver AND (family OR child OR spousal OR partner OR unpaid OR informal OR friend OR neighbor)) OR (Carer AND (family OR child OR spousal OR partner OR unpaid OR informal OR friend OR neighbor))) AND (Chronic illness OR Chronic Disease OR Multiple Chronic Conditions) AND (Financial OR Economic OR Financial Support OR Financial Stress) AND ((Intervention AND Methods) OR (Intervention OR Psychosocial Intervention OR Internet-Based Intervention))

Filter 1997-present

### **Dissertations & Theses Global Search Strategy**

((((caregiver AND (family OR child OR spousal OR partner OR unpaid OR informal OR friend OR neighbor)) OR ((family OR child OR spousal OR partner OR unpaid OR informal OR friend OR neighbor) AND carer)) AND ((chronic illness) OR (chronic disease) OR (multiple chronic conditions)) AND (financial OR economic OR (financial support) OR (financial stress)) AND ((intervention AND methods) OR (intervention OR (psychosocial intervention) OR (internet-based intervention)))) NOT (bdl(1000001 10000018 10000260 10000233 10000265 10000017 10000238 10000253 1007521) AND at.exact("Dissertation/Thesis") AND stype.exact("Dissertations & Theses") AND la.exact("ENG") AND subt.exact("caregivers"))) AND stype.exact("Dissertations & Theses") AND la.exact("English") AND subt.exact("caregivers") AND pd(19970101-20221231)

Filter 1997-present, caregivers, dissertation/thesis, English

### **Web of Science Search Strategy**

((Caregiver AND (family OR child OR spousal OR partner OR unpaid OR informal OR friend OR neighbor)) OR (Carer AND (family OR child OR spousal OR partner OR unpaid OR informal OR friend OR neighbor))) AND (Chronic illness OR Chronic Disease OR Multiple Chronic Conditions) AND (Financial OR Economic OR Financial Support OR Financial Stress) AND ((Intervention AND Methods) OR (Intervention OR Psychosocial Intervention OR Internet-Based Intervention))

Filter 1997-present
